# Supplementary material for: A High Salt Diet Modulates the Gut Microbiota and Short Chain Fatty Acids Production in a Salt-Sensitive Hypertension Rat Model
Source: Nutrients. 2018 Aug 23;10(9):1154. doi: 10.3390/nu10091154 (PMC6164908; doi:10.3390/nu10091154)
Supplement: Supplementary file 1 [file nutrients-10-01154-s001.pdf]

## Suppl. 1- Control diet (2018S) and high salt diet (TD.92034) comparison

### Macronutrients.

| Diet                       | Control (2018s) | HSD (TD.92034) |
|----------------------------|-----------------|----------------|
| Protein %                  | 18.6            | 18.5           |
| Fat %                      | 6.2             | 5.3            |
| Carbohydrate (available) % | 44.2            | 46.7           |
| Fiber (NDF) %              | 14.7            | 11             |
| Energy Density (kcal/g)    | 3.1             | 3.1            |
| NaCl %                     | 0.5             | 4.0            |

### Protein sources.

| Diet      | Control (2018s)                | HSD (TD.92034)                         |
|-----------|--------------------------------|----------------------------------------|
| Primary   | Soybean meal, corn gluten meal | Soybean meal, wheat                    |
| Secondary | Corn, wheat, wheat midds       | Corn, corn gluten meal, , alfalfa meal |

### Fat sources.

| Diet  | Control (2018s)          | HSD (TD.92034) |
|-------|--------------------------|----------------|
| Added | Soybean Oil              | Corn Oil       |
| Other | Corn, wheat, wheat midds | Corn, wheat    |

### Fiber sources.

| Diet         | Control (2018s)    | HSD (TD.92034) |
|--------------|--------------------|----------------|
| Major        | Wheat, Wheat midds | Wheat, corn    |
| Intermediate | Corn               | soybean meal   |
| Minor        | soybean meal       | Alfalfa meal   |

### Carbohydrate sources.

| Diet         | Control (2018s)                | HSD (TD.92034)                 |
|--------------|--------------------------------|--------------------------------|
| Major        | Corn, wheat                    | Corn, wheat                    |
| Intermediate | Wheat midds                    | soybean meal                   |
| Minor        | Corn gluten meal, soybean meal | Corn gluten meal, alfalfa meal |
